# Supplementary material
Source: PubMed Central journal article supplement (PMC4648823)

**Figure S1**

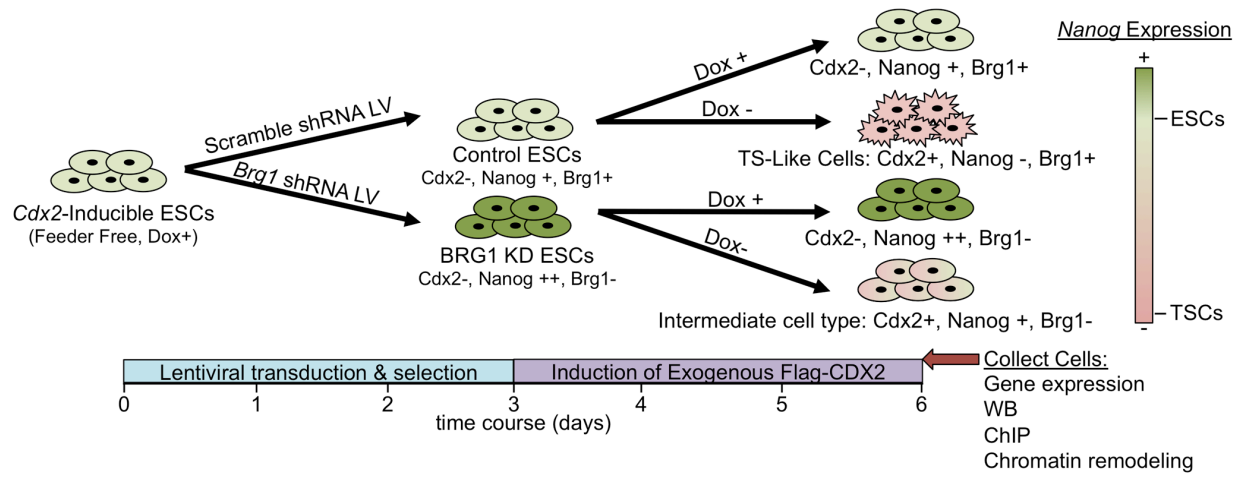

Figure S1. Supplemental Methods and Experimental Design

Supplement: MCB.00546-15_zmb999101043so1.pdf [file MCB.00546-15_zmb999101043so1.pdf]
